# Supplementary material for: Silencing of Dihydroflavonol 4-reductase in Chrysanthemum Ray Florets Enhances Flavonoid Biosynthesis and Antioxidant Capacity
Source: MDPI journal article supplement (doi:10.3390/plants11131681), 2022-06-24
Supplement: s1 [file s1]

**Table S1. Gene specific primers used in this study.**

| Usage           | Primer name       | Primer sequence (5'-3')                |
|-----------------|-------------------|----------------------------------------|
| Gene cloning    | CmDFR-sense-F     | AAAGCAGGCTGAATTCGGAGAAAGCAGCATGGAAA    |
|                 | CmDFR-sense-R     | AAAGCTGGGTGGATCCGCCACCTTATGGATAATCTG   |
|                 | CmDFR-antisense-F | ATAAGGTGGCGGATCTTAGTTGGAACCTTGATACTC   |
|                 | CmDFR-antisense-R | AAAGCTGGGTGGATCCGGAGAAAGCAGCATGGAAA    |
|                 | PANS-F            | ATGTATGATAATTCGAGCTCCGGTCAACTCAAGACAAC |
|                 | PANS-R            | TTGTGATATCACTAGCTCTGTATTATTCTTGCTTTTT  |
| Genotyping      | PANS-F            | ATGTATGATAATTCGAGCTCCGGTCAACTCAAGACAAC |
|                 | CmDFR-sense-R     | AAAGCTGGGTGGATCCGCCACCTTATGGATAATCTG   |
|                 | CmDFR-ORF-F       | GCAGCATGGAAAGCAACAAAG                  |
| Gene expression | CmDFR-F           | GCAGCATGGAAAGCAACAAAG                  |
|                 | CmDFR-R           | GGGACTGATAAATGGACCAACAAC               |
|                 | CmCHS-F           | GGAGAAGATGAGAGCCACTAGACAC              |
|                 | CmCHS-R           | CAGGACCGAACCCGAATAAA                   |
|                 | CmCHI-F           | GCAGGTGTGAGAGGTATG                     |
|                 | CmCHI-R           | GCAACGGAATCGCTTTATC                    |
|                 | CmF3H-F           | GGTGCAAGATTGGAGGGAGAT                  |
|                 | CmF3H-R           | CAGGTTGAGGACACTTTGGGTAG                |
|                 | CmFNS-F           | GCCCAGTCCTCCATCGTTAC                   |
|                 | CmFNS-R           | TAGCGGACCATAGCGAGTTGA                  |
|                 | CmFLS-F           | TCCCATGGTTCACCACTTGA                   |
|                 | CmFLS-R           | TAGTGGAGTCGTGTTTGGTA                   |
|                 | CmF3'H-F          | TCAACGCCACTCTCCTTACCA                  |
|                 | CmF3'H-R          | ACATCAGCACCAGGCTTTTCTC                 |
|                 | CmANS-F           | CACCCCTCTTTCCGCCACGAACCTT              |
|                 | CmANS-R           | ATGTATTGTCTTATTATTTCATGATG             |
|                 | CmUFGT-F          | TTCCCTTTTGCCTCACACCC                   |
|                 | CmUFGT-R          | TTAAGAACCCTGCGAAACTCCT                 |
|                 | CmEF1 $\alpha$ -F | TTTTGGTATCTGGTCCTGGAG                  |
|                 | CmEF1 $\alpha$ -R | CCATTCAAGCGACAGACTCA                   |

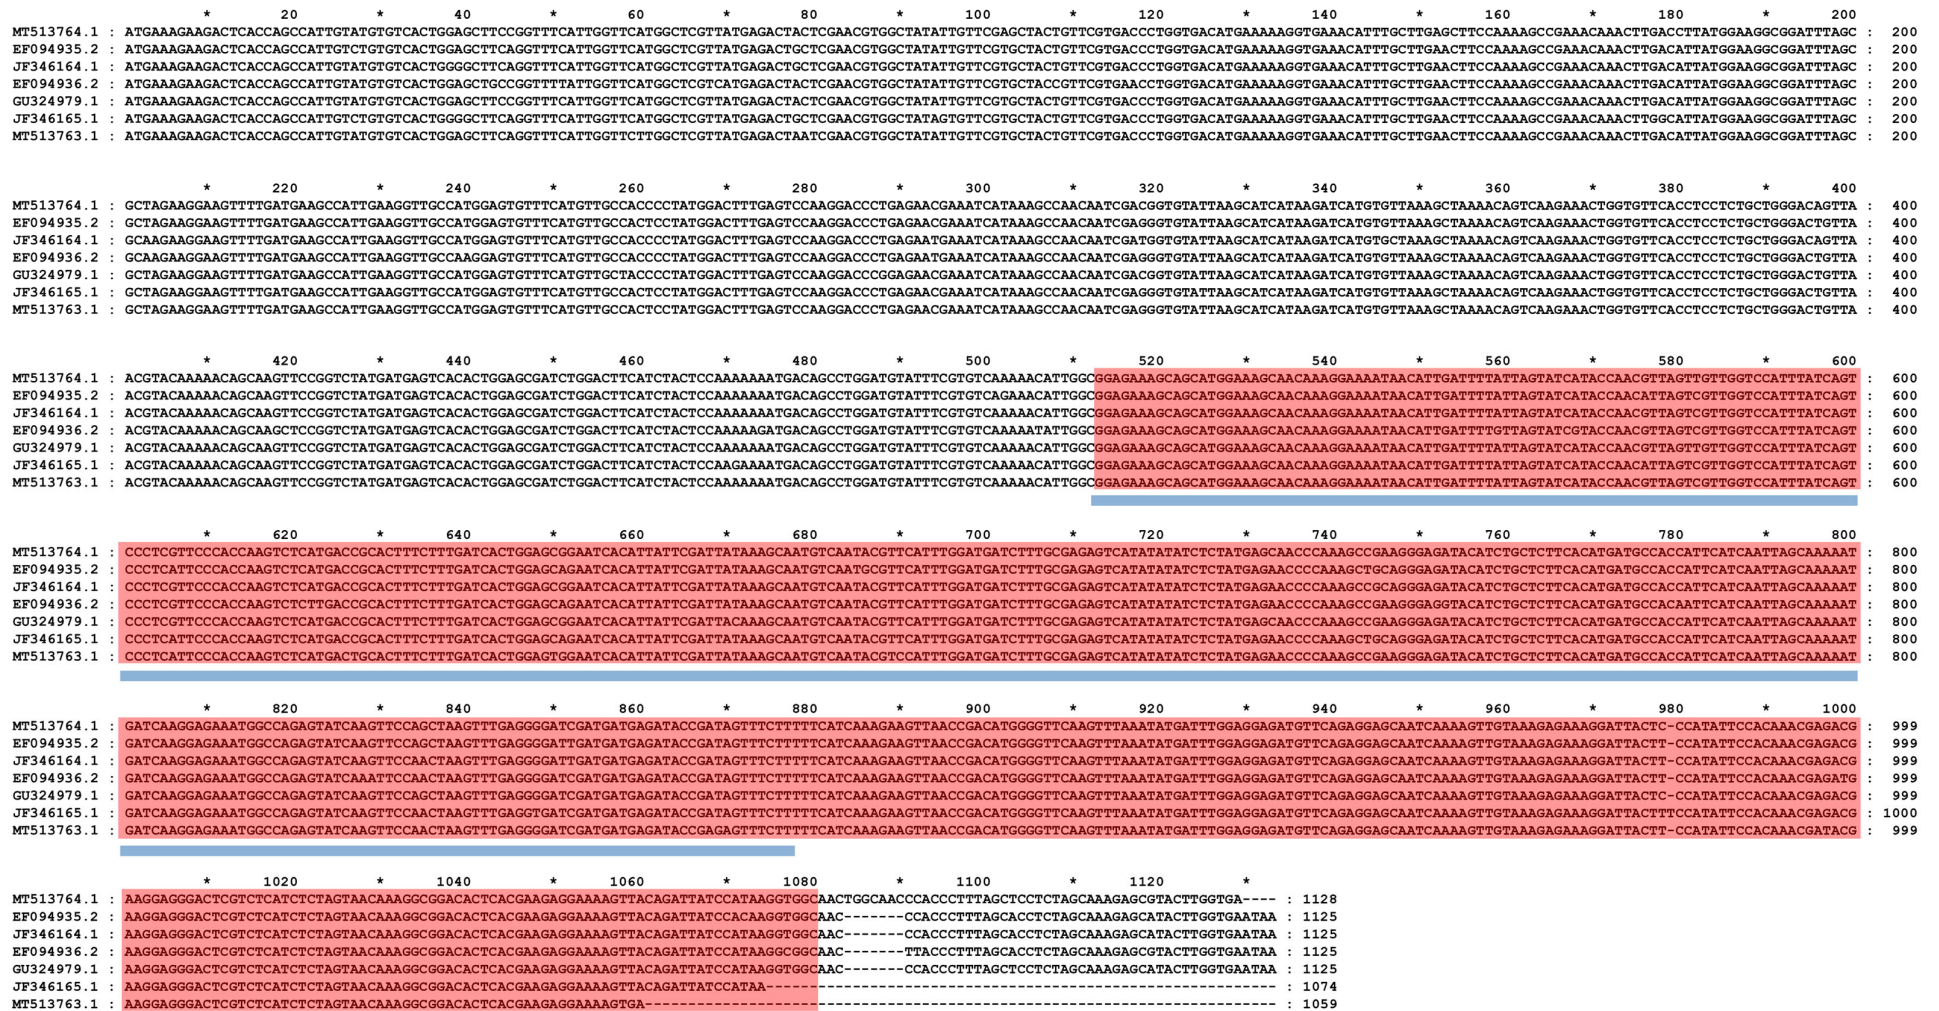

Figure S1. Multiple alignments of the cDNA sequences of *CmDFR* genes from previously deposited at NCBI. To gene silencing of DFR gene by RNA interference construct, the red box fragment was combined in the sense orientation with the antisense fragment which was indicated by the thick blue line.
